# Supplementary material for: 7p22.2 Microduplication: A Pathogenic CNV?
Source: MDPI journal article supplement (doi:10.3390/genes14061292), 2023-06-19
Supplement: s1 [file s1]

**Supplementary Table S1.** Primers for Real-Time PCR assays and relevant genetic regions under investigation

| Patient | Localization             | Forward Sequence       | Backward Sequence     |
|---------|--------------------------|------------------------|-----------------------|
| 1       | CHR12: 56670637-57016306 | GGCCTGGGTGTTCAAGTCAA   | AAACCCGATGTCTCCAATGG  |
| 1       | CHR7: 3074785-3445950    | GGGCTGGTCTGTACCTGAGTCT | CTGGATGTCACTCACCGGAAA |
| 2       | CHR7: 2967525-3422668    |                        |                       |
